# Supplementary material for: High resolution continuous flow analysis impurity data from the Mount Brown South ice core, East Antarctica
Source: Copernicus journal article supplement (doi:10.5194/essd-17-6255-2025), 2025-11-19
Supplement: Supplementary file [file essd-17-6255-2025-supplement-title-page.pdf › essd-17-6255-2025-supplement-title-page.pdf]

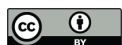

## *Supplement of*

# **High resolution continuous flow analysis impurity data from the Mount Brown South ice core, East Antarctica**

**Margaret Harlan et al.**

*Correspondence to:* Margaret Harlan ([margaret.harlan@utas.edu.au](mailto:margaret.harlan@utas.edu.au)) and Helle Astrid Kjær ([hellek@nbi.ku.dk](mailto:hellek@nbi.ku.dk))

- [essd-17-6255-2025-supplement-title-page.pdf](#)
- [MBS\\_Chemistry\\_calibrations.txt](#)

The copyright of individual parts of the supplement might differ from the article licence.
